# Supplementary material for: Theoretical study for the reaction of fission products Cs and I elements with steam in the HTR-PM primary loop
Source: Royal Society of Chemistry journal article supplement (doi:10.1039/d3nj05552c), 2024-01-01
Supplement: d3nj05552c1.pdf [file d3nj05552c1.pdf]

Supporting Information for

## Theoretical study for the evolution with chemical forms of fission products Cs and I elements in HTR-10

Kerong Wang, Jingni Guo, Feng Xie, Peng Li\*, and Jie Ma

**Figure S1.** ELF shadow plane projection and three-dimensional isosurface diagram.

**Figure S2.** Color-filled map of BOD for Cs+H<sub>2</sub>O.

**Figure S3.** Optimized Cartesian x, y, z coordinates for the reaction of Cs+H<sub>2</sub>O at the B3PW91/ def2-QZVPPD /aug-cc-pVTZ level of theory.

**Figure S4.** Optimized Cartesian x, y, z coordinates for the reaction of I+H<sub>2</sub>O at the PBE0/LANL2DZdp /aug-cc-pVTZ level of theory.

**Figure S5.** Potential energy profile for the reaction of I + H<sub>2</sub>O computed at the PBE0/LANL2DZdp/aug-cc-pVTZ levels of theory. B3LYP and B3PW91 energy parameters are reported in ( ) and [ ] respectively.

**Figure S6.** Potential energy profile for the reaction of I + H<sub>2</sub>O at 250 °C computed on the PBE0/LANL2DZdp/aug-cc-pVTZ levels of theory. B3LYP and B3PW91 energy parameters are reported in ( ) and [ ] respectively.

**Figure S7.** Potential energy profile for the reaction of I + H<sub>2</sub>O at 500 °C computed on the PBE0/LANL2DZdp/aug-cc-pVTZ levels of theory. B3LYP and B3PW91 energy parameters are reported in ( ) and [ ] respectively.

**Figure S8.** Potential energy profile for the reaction of I + H<sub>2</sub>O at 750 °C computed on the PBE0/LANL2DZdp/aug-cc-pVTZ levels of theory. B3LYP and B3PW91 energy parameters are reported in ( ) and [ ] respectively.

**Table S1.** Raw and BSSE corrected energies of the complexes of I+H<sub>2</sub>O and their difference.

**Table S2.** Raw and BSSE corrected energies of the complexes of Cs+H<sub>2</sub>O and their difference.

**Table S3.** Comparison of observed values of CsO with calculated bond lengths and calculated

harmonic frequencies.

**Table S4.** Comparison of observed values and calculated bond lengths for CsOH.

**Table S5.** Comparison of observed values and calculated harmonic frequencies for CsOH.

**Table S6.** Comparison of observed values of IO with calculated bond lengths and calculated harmonic frequencies.

**Table S7.** Comparison of observed values and calculated bond lengths for IOH.

**Table S8.** Comparison of observed values and calculated harmonic frequencies for IOH.

**Table S9.** Topological properties of the charge density calculated in the reaction of Cs+H<sub>2</sub>O.

**Table S10.** Reaction rate constants for I/Cs+H<sub>2</sub>O at 500-1000K.

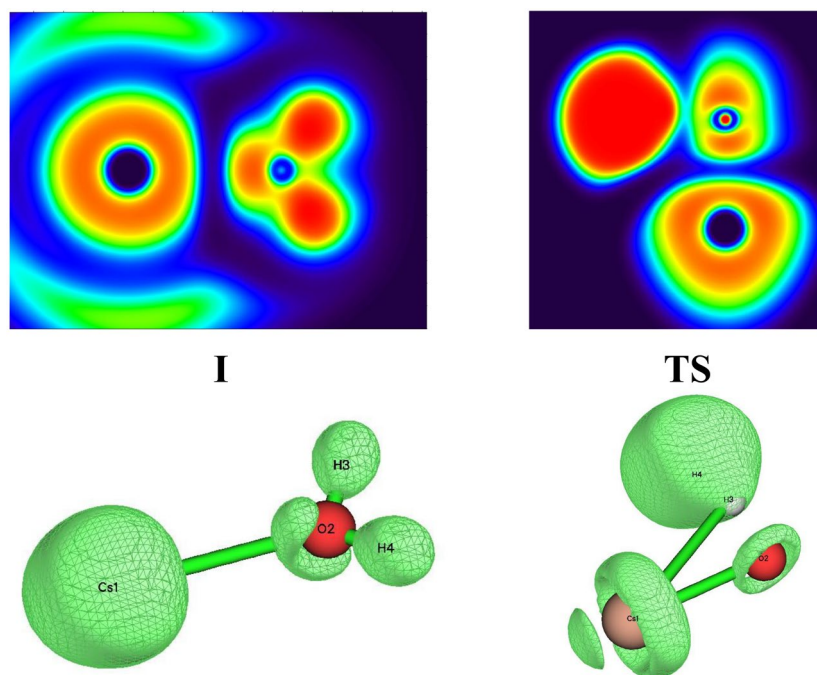

**Figure S1.** ELF shadow plane projection and three-dimensional isosurface diagram of each stagnation point in Cs and H<sub>2</sub>O reaction process calculated by B3PW91/ def2-QZVPPD/aug-cc-pVTZ theory.

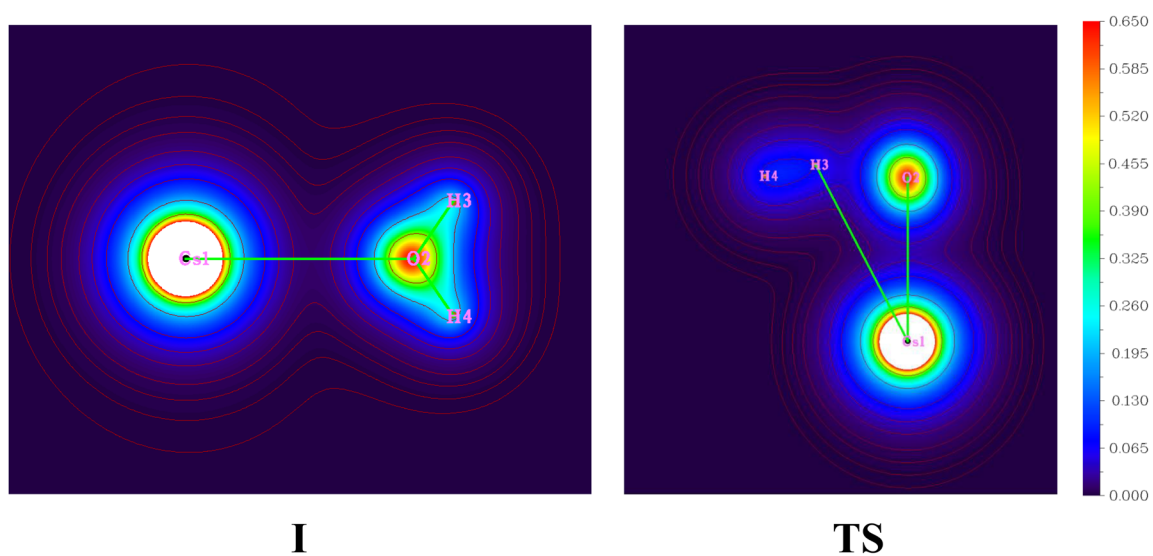

**Figure S2.** Color-filled map of BOD for Cs+H<sub>2</sub>O.

**I**

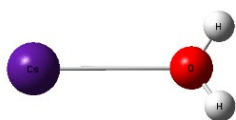

|    | x           | y           | z           |
|----|-------------|-------------|-------------|
| Cs | 0.48123600  | 0.00000000  | -0.00124200 |
| O  | -2.54129000 | -0.00001000 | 0.05746700  |
| H  | -3.06875900 | 0.76726800  | -0.19569200 |
| H  | -3.06891600 | -0.76716800 | -0.19572300 |

**TS**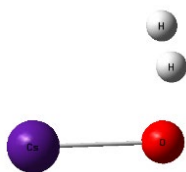

|    | x           | y           | z          |
|----|-------------|-------------|------------|
| Cs | 0.39942000  | 0.00790100  | 0.00000000 |
| O  | -2.11649600 | -0.40081200 | 0.00000000 |
| H  | -2.54255300 | 0.98093700  | 0.00000000 |
| H  | -2.49359800 | 1.79100000  | 0.00000000 |

**Figure S3.** Optimized Cartesian x, y, z coordinates for the reaction of Cs+H<sub>2</sub>O at the B3PW91/ def2-QZVPPD /aug-cc-pVTZ level of theory.

**I**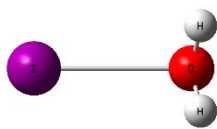

|   | x           | y           | z           |
|---|-------------|-------------|-------------|
| I | -0.45369400 | 0.00000000  | 0.00096400  |
| O | 2.37197800  | 0.00000000  | -0.11715500 |
| H | 2.53498300  | -0.76413600 | 0.44305900  |
| H | 2.53498400  | 0.76413600  | 0.44306000  |

**TS1**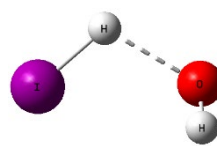

|   | x           | y           | z           |
|---|-------------|-------------|-------------|
| I | -0.43197000 | -0.01154300 | -0.00409500 |
| O | 2.45546900  | 0.04089800  | -0.08203200 |
| H | 2.49275700  | -0.73975100 | 0.49329500  |
| H | 0.75788700  | 1.02436200  | 0.37999300  |

**II**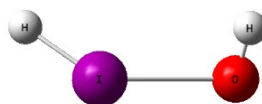

|   | x           | y           | z           |
|---|-------------|-------------|-------------|
| I | 0.33826100  | -0.02837500 | -0.01042200 |
| O | -2.13757700 | -0.03117100 | 0.09089700  |
| H | -2.32410200 | 0.69322000  | -0.52418200 |
| H | 1.49689300  | 1.06004100  | 0.34938900  |

**TS2**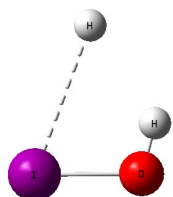

|   | x           | y           | z           |
|---|-------------|-------------|-------------|
| I | -0.30756400 | -0.00995100 | 0.00000000  |
| O | 1.63977600  | -0.32214700 | -0.00000100 |
| H | 2.03244800  | 0.55859300  | -0.00000100 |
| H | 1.15024200  | 2.54596800  | 0.00000100  |

**III**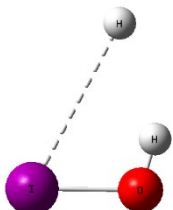

|   | x           | y           | z          |
|---|-------------|-------------|------------|
| I | 0.06285400  | -0.31060500 | 0.00000000 |
| O | 0.06285400  | 1.66285300  | 0.00000000 |
| H | -0.86748500 | 1.91470400  | 0.00000000 |
| H | -2.96661100 | 1.24452800  | 0.00000000 |

**TS3**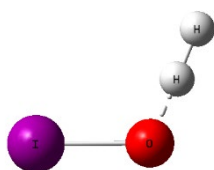

|   | x           | y           | z          |
|---|-------------|-------------|------------|
| I | 0.04866400  | -0.32681100 | 0.00000000 |
| O | 0.04866400  | 1.61023900  | 0.00000000 |
| H | -1.05341900 | 2.05309100  | 0.00000000 |
| H | -1.91508000 | 2.38596300  | 0.00000000 |

**TS4**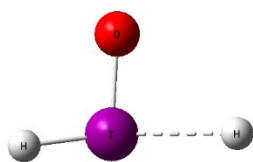

|   | x           | y           | z           |
|---|-------------|-------------|-------------|
| I | 0.22954400  | -0.00014500 | -0.01821300 |
| O | -1.59261600 | -0.08359900 | 0.00734000  |
| H | 0.62427400  | -1.52954400 | 0.53409600  |
| H | -0.04918800 | 2.20603500  | 0.37247500  |

**IV**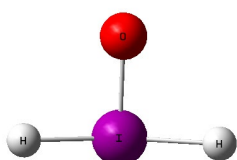

|   | x           | y           | z           |
|---|-------------|-------------|-------------|
| I | 0.23182100  | 0.00000000  | -0.01792900 |
| O | -1.58938700 | 0.00000100  | -0.00115400 |
| H | 0.21429300  | -1.70358000 | 0.47975000  |
| H | 0.21429900  | 1.70359900  | 0.47974500  |

**TS2'**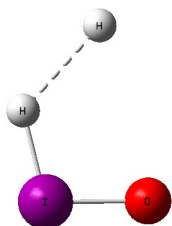

|   | x           | y           | z           |
|---|-------------|-------------|-------------|
| I | -0.24967300 | -0.04650800 | 0.00000100  |
| O | 1.56651200  | -0.25812700 | -0.00000500 |
| H | -0.43015400 | 1.60337500  | 0.00000000  |
| H | 1.13073100  | 2.92655100  | -0.00000600 |

**TS5**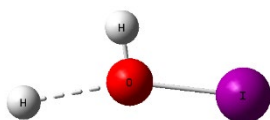

|   | x           | y           | z           |
|---|-------------|-------------|-------------|
| I | 0.35125600  | -0.00737500 | 0.00000200  |
| O | -1.65671700 | 0.00166500  | -0.00004000 |
| H | -1.89681700 | 0.93554800  | 0.00007600  |
| H | -3.46603000 | -0.55796900 | 0.00012500  |

**TS6**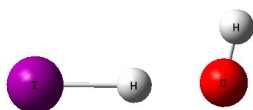

|   | x           | y           | z           |
|---|-------------|-------------|-------------|
| I | 0.49203000  | 0.00202400  | 0.00000000  |
| O | -2.73447100 | -0.10677400 | 0.00000100  |
| H | -2.99918100 | 0.82951500  | 0.00000700  |
| H | -1.20262700 | -0.08258900 | -0.00000200 |

**Figure S4.** Optimized Cartesian x, y, z coordinates for the reaction of I+H<sub>2</sub>O at the PBE0/LANL2DZdp/aug-cc-pVTZ level of theory.

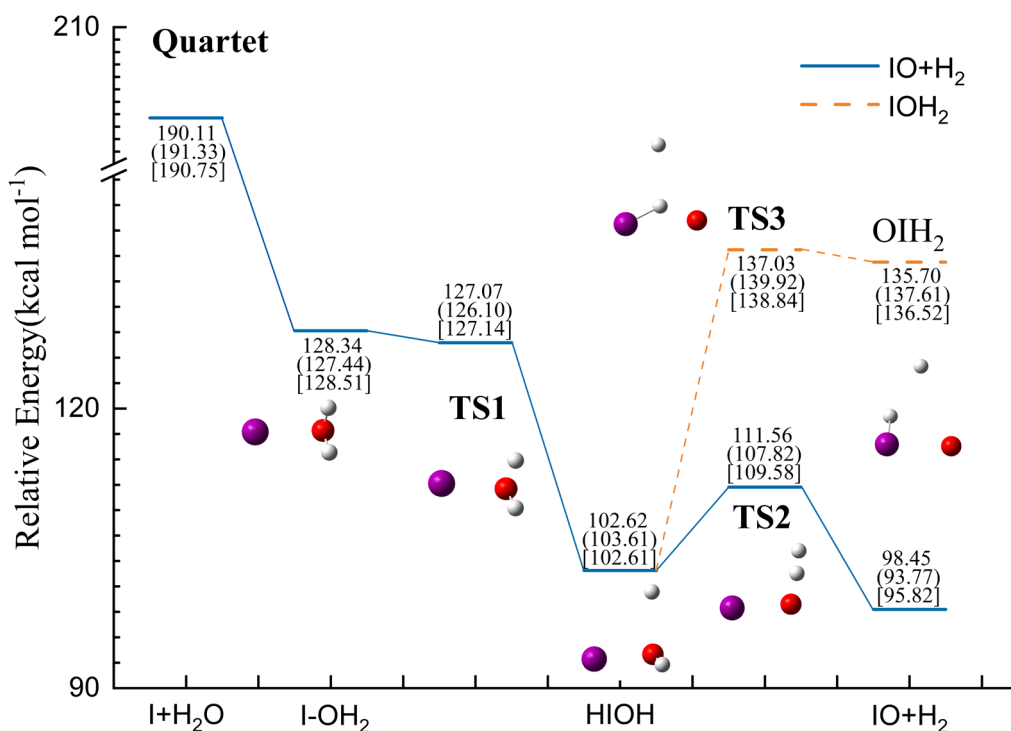

**Figure S5.** Potential energy profile for the reaction of I + H<sub>2</sub>O computed at the PBE0/LANL2DZdp/aug-cc-pVTZ levels of theory. B3LYP and B3PW91 energy parameters are reported in ( ) and [ ] respectively.

For the reaction of I atom with H<sub>2</sub>O in the quartet state, there is a division into isomerization and dehydrogenation channels. The PES curves for I+H<sub>2</sub>O are shown in Figure S5. It can be seen that the reaction process is similar to that of the doublet state. Firstly, the I atom combines with the H<sub>2</sub>O molecule to the reactant complex I-OH<sub>2</sub>(I). This process releases energy 61.77 kcal mol<sup>-1</sup>. Then, the H-O bond is broken to give the first transition state. It has an imaginary frequency of 1724.5 cm<sup>-1</sup>, which corresponds to the process of H atom moving away. It is noteworthy that the Gibbs free energy of I-OH<sub>2</sub> is slightly higher than that of TS1. But comparing their electron energies leads to the opposite conclusion. This is a common and normal phenomenon.<sup>1-2</sup> After crossing the first transition state, the intermediate HIOH is formed. From then on, there is a division into isomerization and dehydrogenation channels. The isomerization product H<sub>2</sub>IO is formed via TS3. The activation barrier to be overcome for the formation of TS3 is 34.41 kcal mol<sup>-1</sup>. It has an imaginary frequency of 408.4 cm<sup>-1</sup>, corresponds to the vibrational mode of H transfer from O atom to I atom. The dehydrogenation channel undergoes the transition state of TS2. The activation barrier to be overcome for its formation is 8.9 kcal mol<sup>-1</sup>. It has an imaginary frequency of 1321.6 cm<sup>-1</sup>, corresponds to a vibrational mode in which the two H atoms move away from the main frame IO. Finally, this reaction forms the product

monomers IO + H<sub>2</sub>.

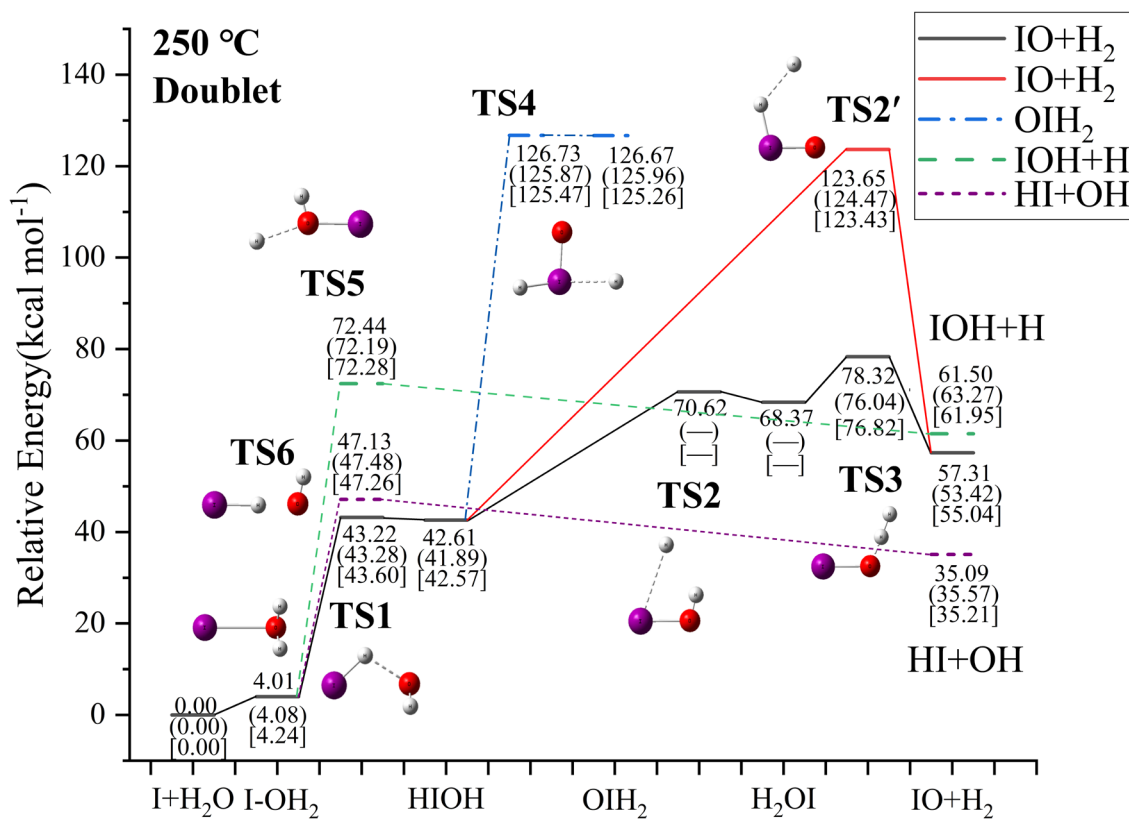

**Figure S6.** Potential energy profile for the reaction of I + H<sub>2</sub>O at 250 °C computed on the PBE0/LANL2DZdp/aug-cc-pVTZ levels of theory. B3LYP and B3PW91 energy parameters are reported in ( ) and [ ] respectively.

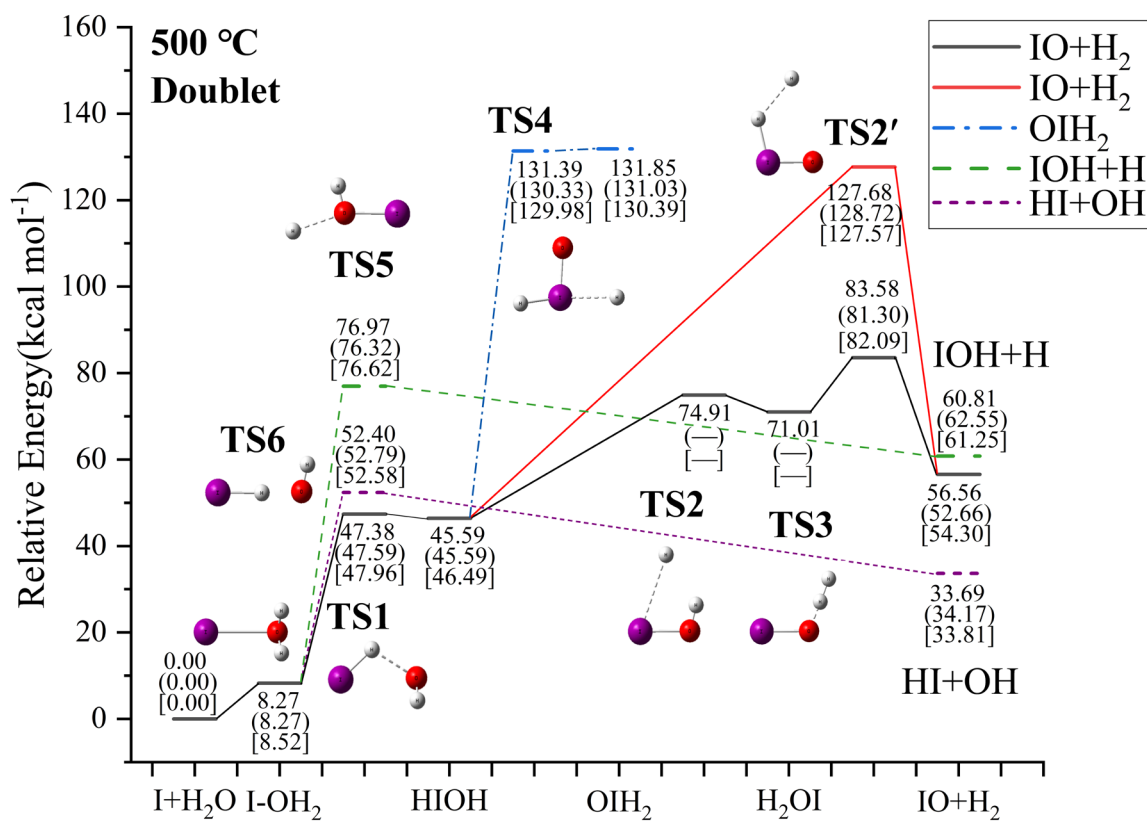

**Figure S7.** Potential energy profile for the reaction of I + H<sub>2</sub>O at 500 °C computed on the PBE0/LANL2DZdp/aug-cc-pVTZ levels of theory. B3LYP and B3PW91 energy parameters are reported in ( ) and [ ] respectively.



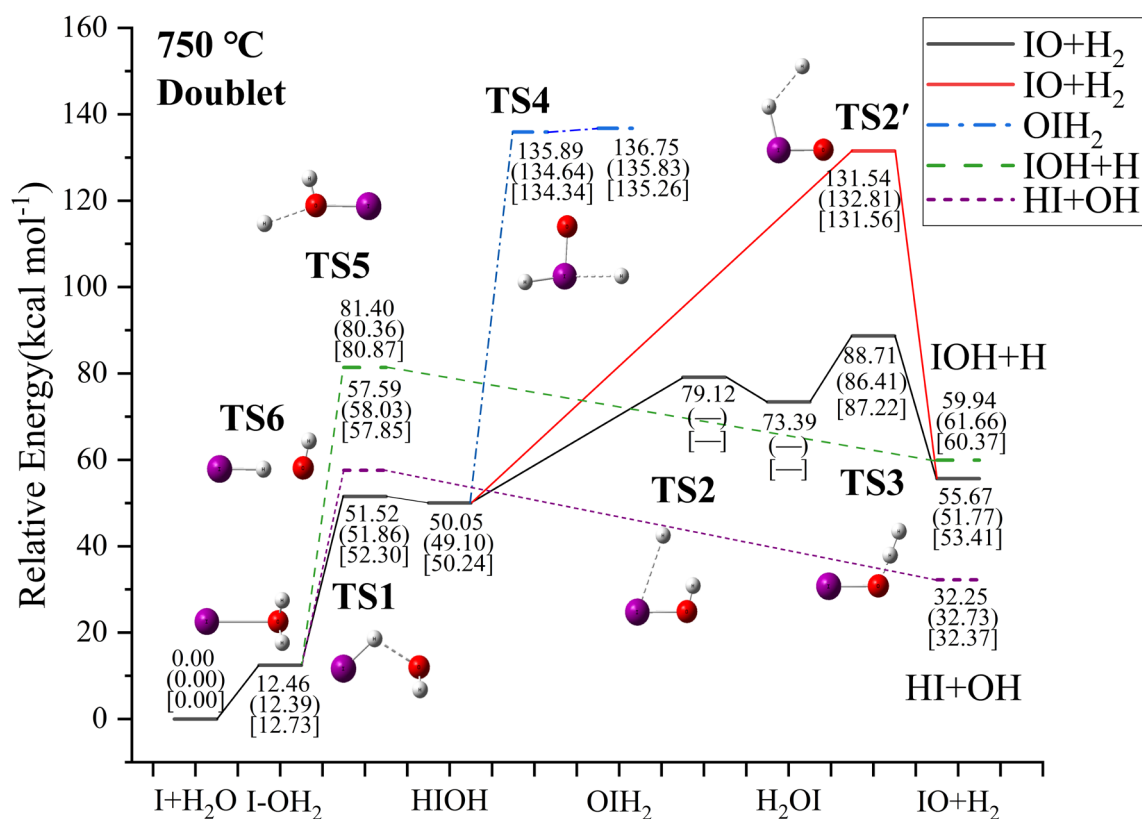

**Figure S8.** Potential energy profile for the reaction of I + H<sub>2</sub>O at 750 °C computed on the PBE0/LANL2DZdp/aug-cc-pVTZ levels of theory. B3LYP and B3PW91 energy parameters are reported in ( ) and [ ] respectively.

**Table S1.** Raw and BSSE corrected energies of the complexes of I+H<sub>2</sub>O and their difference.

| Species | Energy(raw) | Energy(corrected) | $\Delta E(\text{BSSE})/\text{Hartree}$ | $\Delta E(\text{BSSE})/\text{Kcal mol}^{-1}$ |
|---------|-------------|-------------------|----------------------------------------|----------------------------------------------|
| I       | -87.7527    | -87.7523          | 0.00043                                | 0.269829                                     |
| TS1     | -87.6822    | -87.682           | 0.000197                               | 0.123619                                     |
| II      | -87.6842    | -87.684           | 0.000242                               | 0.151857                                     |
| TS2     | -87.6369    | -87.6368          | 0.00013                                | 0.081576                                     |
| III     | -87.637     | -87.6362          | 0.000768                               | 0.481927                                     |
| TS3     | -87.6236    | -87.6228          | 0.000777                               | 0.487575                                     |
| TS2'    | -87.5471    | -87.5469          | 0.000197                               | 0.123619                                     |
| TS4     | -87.5443    | -87.544           | 0.000349                               | 0.219001                                     |
| IV      | -87.5488    | -87.5474          | 0.001471                               | 0.923067                                     |
| TS5     | -87.6348    | -87.6344          | 0.000332                               | 0.208333                                     |
| TS6     | -87.6776704 | -87.677164        | 0.000506                               | 0.317771                                     |

**Table S2.** Raw and BSSE corrected energies of the complexes of Cs+H<sub>2</sub>O and their difference.

| Species | Energy(raw) | Energy(corrected) | $\Delta E(\text{BSSE})/\text{Hartree}$ | $\Delta E(\text{BSSE})/\text{Kcal mol}^{-1}$ |
|---------|-------------|-------------------|----------------------------------------|----------------------------------------------|
| I       | -96.6196    | -96.6196          | 3E-05                                  | 0.018825                                     |
| TS      | -96.5313    | -96.5312          | 0.000139                               | 0.087224                                     |

**Table S3.** Comparison of observed values of CsO with calculated bond lengths and calculated harmonic frequencies. [a] Calculations used the def2-QZVPPD for Cs and 6-311++G\*\* for H and O atoms. [b] Calculations used the def2-QZVPPD for Cs and aug-cc-pVTZ for H and O atoms.

| Method                   | r(Cs-O) | Frequencies(cm <sup>-1</sup> ) |
|--------------------------|---------|--------------------------------|
| B3LYP <sup>[a]</sup>     | 2.364   | 342.5                          |
| B3LYP <sup>[b]</sup>     | 2.350   | 346.1                          |
| B3LYP-D3 <sup>[b]</sup>  | 2.349   | 346.2                          |
| PBE0 <sup>[a]</sup>      | 2.329   | 353.2                          |
| PBE0 <sup>[b]</sup>      | 2.311   | 357.9                          |
| PBE0-D3 <sup>[b]</sup>   | 2.311   | 357.9                          |
| PBE <sup>[a]</sup>       | 2.319   | 344.6                          |
| PBE <sup>[b]</sup>       | 2.302   | 348.9                          |
| PBE-D3 <sup>[b]</sup>    | 2.302   | 348.9                          |
| PW91 <sup>[b]</sup>      | 2.302   | 349.9                          |
| B3PW91 <sup>[a]</sup>    | 2.333   | 350.5                          |
| B3PW91 <sup>[b]</sup>    | 2.317   | 354.9                          |
| B3PW91-D3 <sup>[b]</sup> | 2.317   | 355.0                          |
| Expt                     | 2.300   | 357.0                          |

**Table S4.** Comparison of observed values and calculated bond lengths for CsOH. [a] Calculations used the def2-QZVPPD for Cs and 6-311++G\*\* for H and O atoms. [b] Calculations used the def2-QZVPPD for Cs and aug-cc-pVTZ for H and O atoms.

| Method                   | r(O-H) | r(Cs-O) |
|--------------------------|--------|---------|
| B3LYP <sup>[a]</sup>     | 0.960  | 2.433   |
| B3LYP <sup>[b]</sup>     | 0.959  | 2.428   |
| B3LYP-D3 <sup>[b]</sup>  | 0.959  | 2.427   |
| PBE0 <sup>[a]</sup>      | 0.957  | 2.405   |
| PBE0 <sup>[b]</sup>      | 0.957  | 2.398   |
| PBE0-D3 <sup>[b]</sup>   | 0.957  | 2.400   |
| PBE <sup>[a]</sup>       | 0.968  | 2.413   |
| PBE <sup>[b]</sup>       | 0.968  | 2.409   |
| PBE-D3 <sup>[b]</sup>    | 0.968  | 2.409   |
| PW91 <sup>[b]</sup>      | 0.967  | 2.408   |
| B3PW91 <sup>[a]</sup>    | 0.958  | 2.411   |
| B3PW91 <sup>[b]</sup>    | 0.958  | 2.405   |
| B3PW91-D3 <sup>[b]</sup> | 0.957  | 2.404   |
| Expt                     | 0.920  | 2.403   |

**Table S5.** Comparison of observed values and calculated harmonic frequencies for CsOH. [a] Calculations used the def2-QZVPPD for Cs and 6-311++G\*\* for H and O atoms. [b] Calculations used the def2-QZVPPD for Cs and aug-cc-pVTZ for H and O atoms.

| Method                  | Frequencies(cm <sup>-1</sup> ) |       |       |        |
|-------------------------|--------------------------------|-------|-------|--------|
| B3LYP <sup>[a]</sup>    | 356.2                          | 356.2 | 367.6 | 3885.0 |
| B3LYP <sup>[b]</sup>    | 323.3                          | 323.3 | 367.1 | 3857.6 |
| B3LYP-D3 <sup>[b]</sup> | 321.8                          | 321.8 | 367.9 | 3859.0 |
| PBE0 <sup>[a]</sup>     | 361.4                          | 361.4 | 379.0 | 3944.9 |
| PBE0 <sup>[b]</sup>     | 324.2                          | 324.2 | 378.5 | 3916.5 |
| PBE0-D3 <sup>[b]</sup>  | 323.8                          | 323.8 | 378.7 | 3916.9 |

|                          |       |       |       |        |
|--------------------------|-------|-------|-------|--------|
| PBE <sup>[a]</sup>       | 321.9 | 321.9 | 371.8 | 3785.2 |
| PBE <sup>[b]</sup>       | 295.5 | 295.5 | 369.7 | 3751.3 |
| PBE-D3 <sup>[b]</sup>    | 294.9 | 294.9 | 370.0 | 3751.8 |
| PW91 <sup>[b]</sup>      | 296.4 | 296.4 | 370.8 | 3757.0 |
| B3PW91 <sup>[a]</sup>    | 355.8 | 355.8 | 375.4 | 3915.7 |
| B3PW91 <sup>[b]</sup>    | 319.8 | 319.8 | 375.0 | 3887.4 |
| B3PW91-D3 <sup>[b]</sup> | 309.3 | 309.3 | 375.6 | 3893.7 |
| Expt                     | 306.0 | 306.0 | 336.0 | 3705.0 |

**Table S6.** Comparison of observed values of IO with calculated bond lengths and calculated harmonic frequencies. Calculations used the LANL2DZdp for I and aug-cc-pVTZ for H and O atoms.

| Method    | r(I-O) | Frequencies(cm <sup>-1</sup> ) |
|-----------|--------|--------------------------------|
| B3LYP     | 1.869  | 667.9                          |
| B3LYP-D3  | 1.869  | 668.0                          |
| PBE0      | 1.863  | 681.4                          |
| PBE0-D3   | 1.863  | 681.5                          |
| B3PW91    | 1.865  | 679.4                          |
| B3PW91-D3 | 1.865  | 679.5                          |
| Expt      | 1.868  | 681.6                          |

**Table S7.** Comparison of observed values and calculated bond lengths for IOH. Calculations used the LANL2DZdp for I and aug-cc-pVTZ for H and O atoms.

| Method                   | r(I-O)      | r(H-O) |
|--------------------------|-------------|--------|
| B3LYP <sup>[a]</sup>     | 1.987       | 0.965  |
| B3LYP-D3 <sup>[a]</sup>  | 1.988       | 0.965  |
| PBE0 <sup>[a]</sup>      | 1.975       | 0.962  |
| PBE0-D3 <sup>[a]</sup>   | 1.975       | 0.962  |
| B3PW91 <sup>[a]</sup>    | 1.981       | 0.964  |
| B3PW91-D3 <sup>[a]</sup> | 1.981       | 0.964  |
| Expt                     | 1.959–1.995 | 0.960  |

**Table S8.** Comparison of observed values and calculated harmonic frequencies for IOH. Calculations used the LANL2DZdp for I and aug-cc-pVTZ for H and O atoms.

| Method                   | Frequencies(cm <sup>-1</sup> ) |        |        |
|--------------------------|--------------------------------|--------|--------|
| B3LYP <sup>[a]</sup>     | 573.8                          | 1101.1 | 3795.0 |
| B3LYP-D3 <sup>[a]</sup>  | 573.2                          | 1101.3 | 3795.8 |
| PBE0 <sup>[a]</sup>      | 598.7                          | 1108.3 | 3851.7 |
| PBE0-D3 <sup>[a]</sup>   | 598.6                          | 1108.6 | 3851.6 |
| B3PW91 <sup>[a]</sup>    | 587.1                          | 1103.3 | 3822.4 |
| B3PW91-D3 <sup>[a]</sup> | 587.7                          | 1103.9 | 3822.9 |
| Expt                     | 575.0                          | 1068.0 | 3625.8 |

**Table S9.** Topological properties of the charge density calculated at the (3,-1) BCP for all species involved in the reaction of Cs+H<sub>2</sub>O at the B3PW91/def2-QZVPPD/aug-cc-pVTZ level of theory.

|   | Species | $\rho(r)$ | $\nabla^2\rho(r)$ | G(r)  | V(r)   | H(r)   | $\eta$ |
|---|---------|-----------|-------------------|-------|--------|--------|--------|
| I | Cs-O    | 0.015     | 0.060             | 0.012 | -0.010 | -0.013 | 1.865  |
|   | O-H     | 0.365     | -2.638            | 0.076 | -0.812 | -0.077 | 1.865  |

|     |      |       |        |       |        |        |       |
|-----|------|-------|--------|-------|--------|--------|-------|
| TS1 | O-H  | 0.365 | -2.638 | 0.076 | -0.812 | -0.077 | 0.155 |
|     | Cs-O | 0.047 | 0.152  | 0.040 | -0.044 | -0.041 | 0.201 |
|     | O-H  | 0.087 | 0.121  | 0.065 | -0.101 | -0.066 | 0.370 |
|     | H-H  | 0.219 | -0.839 | 0.010 | -0.230 | -0.010 | 1.254 |
| CsO | CsO  | 0.063 | 0.234  | 0.067 | -0.077 | -0.067 | 0.161 |

**Table S10.** Reaction rate constants for I/Cs+H<sub>2</sub>O at 500-1050K.

| T, K | I-OH <sub>2</sub> → TS1 → HIOH |                       |                       | HIOH → TS2 → H <sub>2</sub> OI |                      |                       | H <sub>2</sub> OI → TS3 → IO+H <sub>2</sub> |                      |                       |
|------|--------------------------------|-----------------------|-----------------------|--------------------------------|----------------------|-----------------------|---------------------------------------------|----------------------|-----------------------|
|      | K <sup>VTST</sup>              | K <sup>VTST/W</sup>   | K <sup>VTST/Eck</sup> | K <sup>VTST</sup>              | K <sup>VTST/W</sup>  | K <sup>VTST/Eck</sup> | K <sup>VTST</sup>                           | K <sup>VTST/W</sup>  | K <sup>VTST/Eck</sup> |
| 500  | 8.56×10 <sup>-5</sup>          | 8.66×10 <sup>-5</sup> | 8.48×10 <sup>-5</sup> | 3.24                           | 3.42                 | 2.38                  | 4.11×10 <sup>3</sup>                        | 4.34×10 <sup>3</sup> | 4.36×10 <sup>3</sup>  |
| 550  | 0.00                           | 0.00                  | 0.00                  | 41.06                          | 42.98                | 30.62                 | 1.88×10 <sup>4</sup>                        | 1.97×10 <sup>4</sup> | 1.98×10 <sup>4</sup>  |
| 600  | 0.08                           | 0.08                  | 0.08                  | 3.42×10 <sup>2</sup>           | 3.56×10 <sup>2</sup> | 2.59×10 <sup>2</sup>  | 6.64×10 <sup>4</sup>                        | 6.90×10 <sup>4</sup> | 6.92×10 <sup>4</sup>  |
| 650  | 1.06                           | 1.07                  | 1.04                  | 2.06×10 <sup>3</sup>           | 2.13×10 <sup>3</sup> | 1.58×10 <sup>3</sup>  | 1.93×10 <sup>5</sup>                        | 1.99×10 <sup>5</sup> | 2.00×10 <sup>5</sup>  |
| 700  | 10.07                          | 10.13                 | 9.67                  | 9.64×10 <sup>3</sup>           | 9.64×10 <sup>3</sup> | 7.36×10 <sup>3</sup>  | 4.79×10 <sup>5</sup>                        | 4.93×10 <sup>5</sup> | 4.94×10 <sup>5</sup>  |
| 750  | 71.18                          | 71.55                 | 68.24                 | 3.68×10 <sup>4</sup>           | 3.77×10 <sup>4</sup> | 2.84×10 <sup>4</sup>  | 1.05×10 <sup>6</sup>                        | 1.08×10 <sup>6</sup> | 1.08×10 <sup>6</sup>  |
| 800  | 3.95×10 <sup>2</sup>           | 3.97×10 <sup>2</sup>  | 3.79×10 <sup>2</sup>  | 1.19×10 <sup>5</sup>           | 1.22×10 <sup>5</sup> | 9.25×10 <sup>4</sup>  | 2.09×10 <sup>6</sup>                        | 2.14×10 <sup>6</sup> | 2.15×10 <sup>6</sup>  |
| 850  | 1.80×10 <sup>3</sup>           | 1.81×10 <sup>3</sup>  | 1.73×10 <sup>3</sup>  | 3.35×10 <sup>5</sup>           | 3.42×10 <sup>5</sup> | 2.63×10 <sup>5</sup>  | 3.84×10 <sup>6</sup>                        | 3.91×10 <sup>6</sup> | 3.92×10 <sup>6</sup>  |
| 900  | 6.93×10 <sup>3</sup>           | 6.96×10 <sup>3</sup>  | 6.68×10 <sup>3</sup>  | 8.44×10 <sup>5</sup>           | 8.59×10 <sup>5</sup> | 6.67×10 <sup>5</sup>  | 6.57×10 <sup>6</sup>                        | 6.69×10 <sup>6</sup> | 6.72×10 <sup>6</sup>  |
| 950  | 2.32×10 <sup>4</sup>           | 2.33×10 <sup>4</sup>  | 2.28×10 <sup>4</sup>  | 1.93×10 <sup>6</sup>           | 1.96×10 <sup>6</sup> | 1.56×10 <sup>6</sup>  | 1.06×10 <sup>7</sup>                        | 1.08×10 <sup>7</sup> | 1.08×10 <sup>7</sup>  |
| 1000 | 6.91×10 <sup>4</sup>           | 6.93×10 <sup>4</sup>  | 6.88×10 <sup>4</sup>  | 4.07×10 <sup>6</sup>           | 4.13×10 <sup>6</sup> | 3.30×10 <sup>6</sup>  | 1.64×10 <sup>7</sup>                        | 1.66×10 <sup>7</sup> | 1.67×10 <sup>7</sup>  |

  

| T, K | HIOH → TS4 → OIH <sub>2</sub> |                        |                        | I-OH <sub>2</sub> → TS5 → IOH+H |                        |                        |
|------|-------------------------------|------------------------|------------------------|---------------------------------|------------------------|------------------------|
|      | K <sup>VTST</sup>             | K <sup>VTST/W</sup>    | K <sup>VTST/Eck</sup>  | K <sup>VTST</sup>               | K <sup>VTST/W</sup>    | K <sup>VTST/Eck</sup>  |
| 500  | 1.11×10 <sup>-24</sup>        | 1.22×10 <sup>-24</sup> | 1.14×10 <sup>-24</sup> | 9.76×10 <sup>-17</sup>          | 9.84×10 <sup>-17</sup> | 9.79×10 <sup>-17</sup> |
| 550  | 2.20×10 <sup>-21</sup>        | 2.39×10 <sup>-21</sup> | 2.24×10 <sup>-21</sup> | 5.28×10 <sup>-14</sup>          | 5.32×10 <sup>-14</sup> | 5.29×10 <sup>-14</sup> |
| 600  | 1.23×10 <sup>-18</sup>        | 1.32×10 <sup>-18</sup> | 1.25×10 <sup>-18</sup> | 1.01×10 <sup>-11</sup>          | 1.02×10 <sup>-11</sup> | 1.01×10 <sup>-11</sup> |
| 650  | 2.63×10 <sup>-16</sup>        | 2.79×10 <sup>-16</sup> | 2.65×10 <sup>-16</sup> | 8.68×10 <sup>-10</sup>          | 8.68×10 <sup>-10</sup> | 8.61×10 <sup>-10</sup> |
| 700  | 2.62×10 <sup>-14</sup>        | 2.76×10 <sup>-14</sup> | 2.57×10 <sup>-14</sup> | 3.97×10 <sup>-8</sup>           | 3.97×10 <sup>-8</sup>  | 3.86×10 <sup>-8</sup>  |
| 750  | 1.42×10 <sup>-12</sup>        | 1.48×10 <sup>-12</sup> | 1.39×10 <sup>-12</sup> | 1.10×10 <sup>-6</sup>           | 1.10×10 <sup>-6</sup>  | 1.06×10 <sup>-6</sup>  |
| 800  | 4.67×10 <sup>-11</sup>        | 4.86×10 <sup>-11</sup> | 4.57×10 <sup>-11</sup> | 2.01×10 <sup>-5</sup>           | 2.02×10 <sup>-5</sup>  | 1.94×10 <sup>-5</sup>  |
| 850  | 1.02×10 <sup>-9</sup>         | 1.06×10 <sup>-9</sup>  | 9.99×10 <sup>-10</sup> | 2.63×10 <sup>-4</sup>           | 2.64×10 <sup>-4</sup>  | 2.52×10 <sup>-4</sup>  |
| 900  | 1.60×10 <sup>-8</sup>         | 1.65×10 <sup>-8</sup>  | 1.56×10 <sup>-8</sup>  | 0.00                            | 0.00                   | 0.00                   |
| 950  | 1.87×10 <sup>-7</sup>         | 1.92×10 <sup>-7</sup>  | 1.85×10 <sup>-7</sup>  | 0.02                            | 0.02                   | 0.02                   |
| 1000 | 1.72×10 <sup>-6</sup>         | 1.76×10 <sup>-6</sup>  | 1.70×10 <sup>-6</sup>  | 0.13                            | 0.13                   | 0.12                   |

  

| T, K | I-OH <sub>2</sub> → TS6 → HI+OH |                       |                       | Cs-OH <sub>2</sub> → TS → CsO+H <sub>2</sub> O |                       |                       |
|------|---------------------------------|-----------------------|-----------------------|------------------------------------------------|-----------------------|-----------------------|
|      | K <sup>VTST</sup>               | K <sup>VTST/W</sup>   | K <sup>VTST/Eck</sup> | K <sup>VTST</sup>                              | K <sup>VTST/W</sup>   | K <sup>VTST/Eck</sup> |
| 500  | 1.10×10 <sup>-6</sup>           | 1.11×10 <sup>-6</sup> | 1.06×10 <sup>-6</sup> | 1.71×10 <sup>-9</sup>                          | 1.86×10 <sup>-9</sup> | 1.79×10 <sup>-9</sup> |
| 550  | 5.46×10 <sup>-5</sup>           | 5.52×10 <sup>-5</sup> | 5.28×10 <sup>-5</sup> | 1.58×10 <sup>-7</sup>                          | 1.69×10 <sup>-7</sup> | 1.63×10 <sup>-7</sup> |
| 600  | 0.00                            | 0.00                  | 0.00                  | 6.90×10 <sup>-6</sup>                          | 7.33×10 <sup>-6</sup> | 7.08×10 <sup>-6</sup> |
| 650  | 0.02                            | 0.02                  | 0.02                  | 1.70×10 <sup>-4</sup>                          | 1.79×10 <sup>-4</sup> | 1.74×10 <sup>-4</sup> |
| 700  | 0.24                            | 0.24                  | 0.23                  | 0.00                                           | 0.00                  | 0.00                  |
| 750  | 1.90                            | 1.91                  | 1.82                  | 0.03                                           | 0.03                  | 0.03                  |
| 800  | 11.57                           | 11.63                 | 11.01                 | 0.24                                           | 0.25                  | 0.24                  |
| 850  | 57.13                           | 57.39                 | 54.74                 | 1.54                                           | 1.58                  | 1.51                  |
| 900  | 2.37×10 <sup>2</sup>            | 2.38×10 <sup>2</sup>  | 2.27×10 <sup>2</sup>  | 8.05                                           | 8.27                  | 7.89                  |
| 950  | 8.47×10 <sup>2</sup>            | 8.50×10 <sup>2</sup>  | 8.22×10 <sup>2</sup>  | 35.54                                          | 36.41                 | 35.59                 |
| 1000 | 2.67×10 <sup>3</sup>            | 2.68×10 <sup>3</sup>  | 2.59×10 <sup>3</sup>  | 1.36×10 <sup>2</sup>                           | 1.39×10 <sup>2</sup>  | 1.36×10 <sup>2</sup>  |

---

[1] Z Zhao, Y.-X.; Wu, X.-N.; Ma, J.-B.; He, S.-G.; Ding, X.-L. Experimental and Theoretical Study of the Reactions between Vanadium-Silicon Heteronuclear Oxide Cluster Anions with N-Butane, *J. Phys. Chem. C* 2010,114, 12271-12279.

[2] Feyel, S.; Döbler, J.; Hoeckendorf, R.; Beyer, M. K.; Sauer, J.; Schwarz, H. Activation of Methane by Oligomeric  $[(Al_2O_3)_X]^+$  ( $X=3,4,5$ ): The Role of Oxygen-Centered Radicals in Thermal Hydrogen-Atom Abstraction, *Angew. Chem. Int. Ed.* 2008,47, 1946-1950.
